# Supplementary material
Source: MDPI journal article supplement (https://www.mdpi.com/1424-2818/13/12/614)
Supplement: s1 [file s1]

Archive with 2 entries (2 files):
- Calamita parotoid-speed.xlsx
- Supplementary Material calamita par¿«tidas carrera.pdf
