# Supplementary material
Source: MDPI journal article supplement (https://www.mdpi.com/1424-2818/13/12/614)
Supplement: s1 [file s1 › Calamita parotoid-speed.xlsx]

## Sheet: Sheet1
ID	Habitat	Sexo	SVL	Sprint speed (cm/s)	Resid Speed-SVL	Parót Izq área	Parót Izq L	Parót Izq a	Parót Izq b	Parót Dch área	Parót Dch L	Parót Dch a	Parót Dch b	Suma Parót área	Resid Área Parot-SVL	Media Parót L	Media Parót a	Media Parót b	Dorso L	Dorso a	Dorso b	Dorso C	Dorso H	dE parot-dorso
29	Pinar	Female	68	33.33	-19.9441	37.65	34	6	12	36.03	40	7	14	73.68	-11.7322	37	6.5	13	30	2	9	9.21954	12.5288	9.23309
30	Pinar	Male	68	71.43	18.1559	37.8	28	0	19	42.83	35	0	16	80.63	-4.7822	31.5	0	17.5	21	0	9	9	0	13.5093
31	Pinar	Female	52	31.25	-12.2261	22.21	29	8	17	16.52	36	8	17	38.73	-11.7914	32.5	8	17	29	5	14	14.8661	19.6538	5.5
32	Pinar	Female	75	50	-7.56072	48.82	18	2	8	45.07	21	2	9	93.89	-6.78693	19.5	2	8.5	15	0	5	5	0	6.04152
33	Pinar	Female	58	50	2.84968	24.73	35	3	23	26.52	36	2	22	51.25	-12.3555	35.5	2.5	22.5	25	0	13	13	0	14.3788
34	Pinar	Female	76	38.46	-19.7131	36.76	20	3	11	35.6	24	3	11	72.36	-30.4976	22	3	11	15	1	5	5.09902	11.3099	9.43398
35	Pinar	Female	78	21.74	-37.6578	49.09	37	2	22	41.48	36	2	21	90.57	-16.649	36.5	2	21.5	25	1	11	11.0454	5.19443	15.6045
36	Pinar	Male	60	50	1.62493	30.7	31	2	26	34.8	39	1	26	65.5	-2.4668	35	1.5	26	29	-2	20	20.0998	-5.71059	9.17878
37	Pinar	Male	48	50	8.97345	24.64	28	5	19	24.45	29	6	19	49.09	7.2913	28.5	5.5	19	20	1	11	11.0454	5.19443	12.51
38	Pinar	Female	50	41.67	-0.581308	17.71	32	4	17	20.28	30	5	17	37.99	-8.17005	31	4.5	17	21	1	8	8.06226	7.12502	13.9014
39	Pinar	Male	64	45.45	-5.37458	35.81	33	1	19	38.69	35	0	19	74.5	-2.1895	34	0.5	19	24	0	13	13	0	11.6726
40	Pinar	Female	77	62.5	3.71453	44.23	17	2	7	39.82	14	2	6	84.05	-20.9883	15.5	2	6.5	12	1	4	4.12311	14.0362	4.41588
41	Pinar	Male	72	38.46	-17.2636	44.71	29	3	17	35.43	25	3	16	80.14	-13.9949	27	3	16.5	19	0	9	9	0	11.3688
42	Pinar	Female	51	35.71	-7.15368	22.5	31	3	17	27.62	31	4	17	50.12	1.77927	31	3.5	17	20	1	9	9.05539	6.34019	13.8293
43	Pinar	Female	50	29.41	-12.8413	20.26	22	4	12	25.5	20	3	10	45.76	-0.400052	21	3.5	11	16	1	6	6.08276	9.46232	7.5
44	Pinar	Female	71	45.45	-9.66121	47.99	24	3	9	50.45	26	4	9	98.44	6.48577	25	3.5	9	20	2	8	8.24621	14.0362	5.31507
45	Pinar	Male	68	55.56	2.28592	44.6	33	1	18	30.78	36	1	19	75.38	-10.0322	34.5	1	18.5	24	0	11	11	0	12.9422
46	Pinar	Female	50	45.45	3.19869	16.82	34	12	24	16.84	33	12	22	33.66	-12.5001	33.5	12	23	29	3	15	15.2971	11.3099	12.855
47	Pinar	Male	58	55.56	8.40968	36.5	22	0	16	36.36	24	0	17	72.86	9.25455	23	0	16.5	16	0	8	8	0	11.0114
48	Pinar	Female	50	38.46	-3.79131	19.21	16	5	8	19.35	23	4	10	38.56	-7.60005	19.5	4.5	9	17	1	4	4.12311	14.0362	6.59545
49	Pinar	Female	54	22.72	-21.9808	25.94	26	11	16	27.9	27	11	18	53.84	-1.04275	26.5	11	17	19	3	10	10.4403	16.6992	13.0096
50	Pinar	Male	60	27.78	-20.5951	30.32	23	2	15	29.43	23	3	14	59.75	-8.2168	23	2.5	14.5	14	0	6	6	0	12.6293
51	Pinar	Female	56	25	-20.9256	19.97	20	6	10	19.55	25	6	12	39.52	-19.7241	22.5	6	11	21	2	8	8.24621	14.0362	5.22015
52	Pinar	Male	49	38.46	-3.17893	21.99	27	8	17	18.59	27	9	17	40.58	-3.39938	27	8.5	17	18	2	8	8.24621	14.0362	14.2916
53	Pinar	Male	54	27.78	-16.9208	25.38	23	6	16	27.04	24	6	16	52.42	-2.46275	23.5	6	16	18	1	13	13.0384	4.39871	8.01561
54	Pinar	Male	56	29.41	-16.5156	34.99	27	5	18	29.49	29	5	20	64.48	5.2359	28	5	19	22	0	11	11	0	11.1803
55	Pinar	Male	49	31.25	-10.3889	17.82	21	1	15	22.4	18	1	12	40.22	-3.75938	19.5	1	13.5	15	0	9	9	0	6.44205
56	Pinar	Female	55	41.67	-3.64319	26.13	20	7	10	33.24	21	6	9	59.37	2.30657	20.5	6.5	9.5	19	2	6	6.32456	18.4349	5.89491
57	Pinar	Male	58	13.16	-33.9903	28.42	29	1	16	26.49	31	1	14	54.91	-8.69545	30	1	15	20	0	7	7	0	12.8452
58	Pinar	Female	53	35.71	-8.37844	23.88	31	8	22	28.45	31	8	21	52.33	-0.372078	31	8	21.5	25	2	12	12.1655	9.46232	12.7377
59	Pinar	Female	51	27.78	-15.0837	26.39	23	3	11	28.24	25	3	11	54.63	6.28927	24	3	11	18	0	6	6	0	8.3666
60	Pinar	Male	61	15.15	-33.8374	29.39	22	6	15	33.08	21	5	13	62.47	-7.67748	21.5	5.5	14	18	0	9	9	0	8.21584
61	Pinar	Female	73	45.45	-10.886	35.55	28	7	11	28.53	30	7	11	64.08	-32.2356	29	7	11	27	2	7	7.28011	15.9454	6.7082
62	Pinar	Female	49	27.78	-13.8589	26.97	22	6	16	21.5	24	7	17	48.47	4.49062	23	6.5	16.5	17	2	8	8.24621	14.0362	11.3358
63	Cultivo	Female	52	26.32	-17.1561	22.6	21	10	12	18.89	23	10	14	41.49	-9.0314	22	10	13	20	4	9	9.84886	23.9625	7.48331
64	Cultivo	Male	82	55.56	-6.28735	71.05	38	0	27	67.76	31	0	24	138.81	22.8683	34.5	0	25.5	24	0	18	18	0	12.9035
65	Cultivo	Female	60	41.67	-6.70507	28.82	23	5	13	38.18	22	4	12	67	-0.966803	22.5	4.5	12.5	17	1	6	6.08276	9.46232	9.20598
66	Cultivo	Male	55	41.67	-3.64319	26.05	32	5	20	23.37	35	4	21	49.42	-7.64343	33.5	4.5	20.5	27	0	19	19	0	8.04674
67	Cultivo	Female	77	35.71	-23.0755	34.81	30	6	21	45.17	34	6	21	79.98	-25.0583	32	6	21	26	1	11	11.0454	5.19443	12.6886
68	Cultivo	Female	69	15.63	-38.2565	42.39	27	4	11	37.79	28	4	10	80.18	-7.41288	27.5	4	10.5	20	2	6	6.32456	18.4349	8.97218
75	Pinar	Male	70	62.5	8.00117	41.39	32	1	13	43.61	33	2	13	85	-4.77355	32.5	1.5	13	26	1	9	9.05539	6.34019	7.64853
76	Pinar	Male	55	55.56	10.2468	28.81	37	2	23	19.78	42	2	24	48.59	-8.47343	39.5	2	23.5	29	0	18	18	0	12.0208
77	Pinar	Male	57	62.5	15.9621	23.82	44	5	25	22	49	4	25	45.82	-15.6048	46.5	4.5	25	35	2	17	17.1172	6.70984	14.2302
78	Pinar	Male	78	83.33	23.9322	35.69	28	1	14	52.48	28	1	12	88.17	-19.049	28	1	13	23	1	10	10.0499	5.71059	5.83095
79	Pinar	Male	68	47.62	-5.65408	45.72	45	7	32	50.45	45	7	32	96.17	10.7578	45	7	32	38	4	25	25.318	9.09028	10.3441
80	Pinar	Male	65	100	48.563	44.18	39	3	18	40.5	42	3	14	84.68	5.80982	40.5	3	16	30	1	12	12.0416	4.76364	11.4127
81	Pinar	Male	66	55.56	3.51067	40.69	29	1	13	38.79	33	1	12	79.48	-1.57085	31	1	12.5	25	1	11	11.0454	5.19443	6.18466
82	Pinar	Male	65	71.43	19.993	40.1	44	4	34	42.15	51	3	32	82.25	3.37982	47.5	3.5	33	33	0	20	20	0	19.7864
83	Pinar	Male	75	71.43	13.8693	43.72	25	2	11	52.12	24	2	12	95.84	-4.83693	24.5	2	11.5	19	0	7	7	0	7.38241
84	Pinar	Male	65	71.43	19.993	38.04	31	3	17	36.16	31	4	16	74.2	-4.67018	31	3.5	16.5	28	1	16	16.0312	3.57633	3.937
85	Cultivo	Male	58	41.67	-5.48032	36.13	28	5	16	31.04	32	4	27	67.17	3.56455	30	4.5	21.5	24	0	18	18	0	8.27647
86	Cultivo	Male	63	62.5	12.2878	38.77	29	2	22	39.52	28	1	20	78.29	3.78117	28.5	1.5	21	21	0	15	15	0	9.72111
87	Cultivo	Male	63	62.5	12.2878	36.16	31	3	17	36.35	34	2	16	72.51	-1.99883	32.5	2.5	16.5	26	0	12	12	0	8.29156
88	Cultivo	Male	64	83.33	32.5054	46.67	45	3	27	48.1	42	2	28	94.77	18.0805	43.5	2.5	27.5	35	1	21	21.0238	2.72631	10.8051
89	Cultivo	Male	80	71.43	10.8074	52.93	45	0	26	70.33	44	0	26	123.26	11.6797	44.5	0	26	30	0	18	18	0	16.5605
90	Cultivo	Female	65	62.5	11.063	25.88	48	5	22	21.05	43	5	22	46.93	-31.9402	45.5	5	22	31	1	13	13.0384	4.39871	17.5285
91	Cultivo	Female	52	38.46	-5.01606	27.63	38	6	16	28.17	43	5	14	55.8	5.2786	40.5	5.5	15	29	2	10	10.198	11.3099	13.0192
92	Cultivo	Female	78	38.46	-20.9378	44.89	41	3	27	43.08	44	2	25	87.97	-19.249	42.5	2.5	26	29	1	15	15.0333	3.81407	17.4786
93	Cultivo	Male	61	27.78	-21.2074	33.13	46	1	25	32.34	51	1	23	65.47	-4.67748	48.5	1	24	35	0	15	15	0	16.2558
94	Cultivo	Male	64	62.5	11.6754	45.55	47	3	38	45.91	51	2	36	91.46	14.7705	49	2.5	37	39	1	31	31.0161	1.84761	11.758
95	Cultivo	Male	76	100	41.8269	54.95	51	5	36	54.95	51	4	35	109.9	7.0424	51	4.5	35.5	35	3	26	26.1725	6.58194	18.6682
96	Cultivo	Female	79	41.67	-18.3402	51.39	46	3	28	51.48	50	2	28	102.87	-6.52963	48	2.5	28	37	1	22	22.0227	2.60256	12.6194
97	Cultivo	Male	71	45.45	-9.66121	48.62	30	0	22	46.05	35	-2	23	94.67	2.71577	32.5	-1	22.5	23	-2	16	16.1245	-7.12502	11.5542
98	Cultivo	Male	59	83.33	35.5673	40.72	29	1	19	40.39	31	2	19	81.11	15.3239	30	1.5	19	22	0	14	14	0	9.55249
99	Cultivo	Female	76	45.45	-12.7231	60.05	45	2	25	53.63	51	1	24	113.68	10.8224	48	1.5	24.5	35	0	18	18	0	14.6116
100	Cultivo	Female	75	62.5	4.93928	52.25	47	3	28	47.37	46	3	29	99.62	-1.05693	46.5	3	28.5	40	0	23	23	0	9.02774
101	Cultivo	Female	60	50	1.62493	34.28	40	4	17	40.2	40	3	17	74.48	6.5132	40	3.5	17	33	1	12	12.0416	4.76364	8.95824
102	Cultivo	Male	60	50	1.62493	37.16	45	0	27	33.68	47	1	29	70.84	2.8732	46	0.5	28	32	0	16	16	0	18.4459
103	Cultivo	Female	69	55.56	1.67354	46.04	47	7	23	37.09	51	8	25	83.13	-4.46288	49	7.5	24	39	1	17	17.0294	3.36646	13.8293
104	Cultivo	Male	65	55.56	4.12305	46.93	45	5	32	51.79	50	3	32	98.72	19.8498	47.5	4	32	38	1	27	27.0185	2.1211	11.1467
105	Cultivo	Female	81	55.56	-5.67497	77.79	45	10	29	69.49	50	8	29	147.28	33.519	47.5	9	29	38	5	22	22.561	12.8043	12.4599
106	Cultivo	Female	69	62.5	8.61354	52.24	36	6	19	55.25	36	8	19	107.49	19.8971	36	7	19	29	3	14	14.3178	12.0948	9.48683
107	Cultivo	Male	59	71.43	23.6673	38.56	40	1	31	34.94	40	1	30	73.5	7.71387	40	1	30.5	32	0	25	25	0	9.75961
108	Cultivo	Male	59	45.45	-2.31269	32.5	40	3	32	30.56	40	4	29	63.06	-2.72613	40	3.5	30.5	28	1	22	22.0227	2.60256	14.9164
109	Pinar	Male	66	83.33	31.2807	46.19	48	4	34	45.15	49	4	32	91.34	10.2891	48.5	4	33	42	3	29	29.1548	5.90614	7.6974
110	Pinar	Female	68	45.45	-7.82408	57.82	45	4	20	44.92	45	3	22	102.74	17.3278	45	3.5	21	33	3	16	16.2788	10.6197	13.0096
111	Cultivo	Female	77	55.56	-3.22547	52.3	47	8	23	55.25	49	6	23	107.55	2.51172	48	7	23	36	2	16	16.1245	7.12502	14.7648
112	Cultivo	Female	58	50	2.84968	35.58	33	1	7	38.53	29	2	10	74.11	10.5045	31	1.5	8.5	25	0	5	5	0	7.10634
113	Cultivo	Male	65	100	48.563	55.38	41	-2	16	53.23	44	-2	16	108.61	29.7398	42.5	-2	16	39	-3	12	12.3693	-14.0362	5.40833
114	Cultivo	Male	72	62.5	6.77641	55.46	44	-2	20	58.16	47	-2	24	113.62	19.4851	45.5	-2	22	37	-3	19	19.2354	-8.97263	9.06918
115	Cultivo	Female	55	62.5	17.1868	36.94	28	3	8	27.97	33	4	13	64.91	7.84657	30.5	3.5	10.5	21	1	5	5.09902	11.3099	11.2583
116	Cultivo	Male	60	100	51.6249	38.74	50	-2	21	30.64	51	0	23	69.38	1.4132	50.5	-1	22	39	-3	16	16.2788	-10.6197	13.1244
117	Cultivo	Female	52	62.5	19.0239	31.58	25	2	8	30.22	25	3	11	61.8	11.2786	25	2.5	9.5	17	0	4	4	0	10.025
118	Cultivo	Female	60	38.46	-9.91507	42.58	31	1	13	31.66	33	2	14	74.24	6.2732	32	1.5	13.5	24	0	6	6	0	11.068
119	Cultivo	Female	69	55.56	1.67354	50.47	33	3	11	46.92	34	4	16	97.39	9.79712	33.5	3.5	13.5	21	1	6	6.08276	9.46232	14.7902
120	Cultivo	Female	66	71.43	19.3807	48.82	29	2	8	46.72	29	2	11	95.54	14.4891	29	2	9.5	22	0	6	6	0	8.07775
121	Cultivo	Male	62	55.56	5.96018	47.38	31	0	1	44.09	30	0	2	91.47	19.1418	30.5	0	1.5	25	0	2	2	0	5.52268
122	Cultivo	Female	76	33.33	-24.8431	59.62	44	5	12	56.02	47	5	13	115.64	12.7824	45.5	5	12.5	38	1	7	7.07107	8.1301	10.1242
